# Supplementary material
Source: PubMed Central journal article supplement (PMC8072239)
Supplement: pnas.2020719118.sapp.pdf [file pnas.2020719118.sapp.pdf]

# PNAS

[www.pnas.org](http://www.pnas.org)

Supplementary Information for

## Constraining the atmospheric limb of the plastic cycle

Janice Brahney<sup>1\*</sup>, Natalie Mahowald<sup>2\*</sup>, Marje Prank<sup>2,3</sup>, Gavin Cornwell<sup>4</sup>, Zbigniew Klimont<sup>5</sup>,  
Hitoshi Matsui<sup>6</sup>, Kimberly Ann Prather<sup>7</sup>

**Janice Brahney**, [janice.brahney@usu.edu](mailto:janice.brahney@usu.edu)

**Natalie M. Mahowald**, [mahowald@cornell.edu](mailto:mahowald@cornell.edu)

### **This PDF file includes:**

Supplemental text related to sensitivity studies.  
Figures S1 to S6  
Tables S1 to S3

### Supplemental text: Additional sensitivity studies.

As stated in the text, we add an additional sensitivity study where the a priori information about the size of the road and braking source is included based on (29). Unfortunately, this is the first study to consider other atmospheric sources, and thus there is no information to include. To include a priori information about the strength of this source, and its error, we use a Bayesian approach and add a term to the cost function:

$$\chi^2 = \sum_j \left[ \frac{(y_{model,j} - y_{obs,j})}{\sigma_j} \right]^2 + P + \frac{(S_r - S_m)^2}{\sigma_s} \quad (\text{eq. 1})$$

Where  $S_r$  is the a priori best estimate with the uncertainty ( $\sigma_s$ ) from (29) or 284 (102-787) Gg yr<sup>-1</sup>, and  $S_m$  is our estimate. The uncertainties bars on their estimate are not symmetric, but since their value is larger than ours, we use the lower limit estimate (284-102=182 Gg yr<sup>-1</sup>) for our  $\sigma_s$ . The rest of the variables are identical to the approach in the main text, but repeated here:  $y_{obs,j}$  are the 316 observations, and  $y_{model,j}$  is found using the following equation:

$$y_{model,j} = \sum_i S_i * R_{i,j}$$

Where  $R_{i,j}$  is the modeled relationship between each source (i) and the deposition at each site (j). P represents a penalty which is assessed if any of the sources become negative. The magnitude of this is set to force all the estimations to result in positive values. The  $\sigma_j$  is the model-observational error or uncertainty in each observation, when compared against the model. This will be the sum of direct observational error, in addition to the error in the model's ability to represent accurately the observation.

Including the very uncertain a priori information does not significantly shift our 95% uncertainty estimates, although it does result in a quantitatively different answer (Figure S6).

Our second supplemental sensitivity study is to use a slightly different ocean distribution for our inversion. In the base case we deduce from flow convergence the location of the buildup of plastics, and matched these to estimates from van Sebille et al. (10) for basin averages, while in the ocean sensitivity study we directly use the van Sebille et al. (10) estimate of ocean plastics based on <5mm sizes as our spatial distribution. The two distributions are qualitatively similar, but in details they are different (especially the Arctic), but both provide similar optical estimations for the final strength of the ocean sources, which is very uncertain (Figure S6).

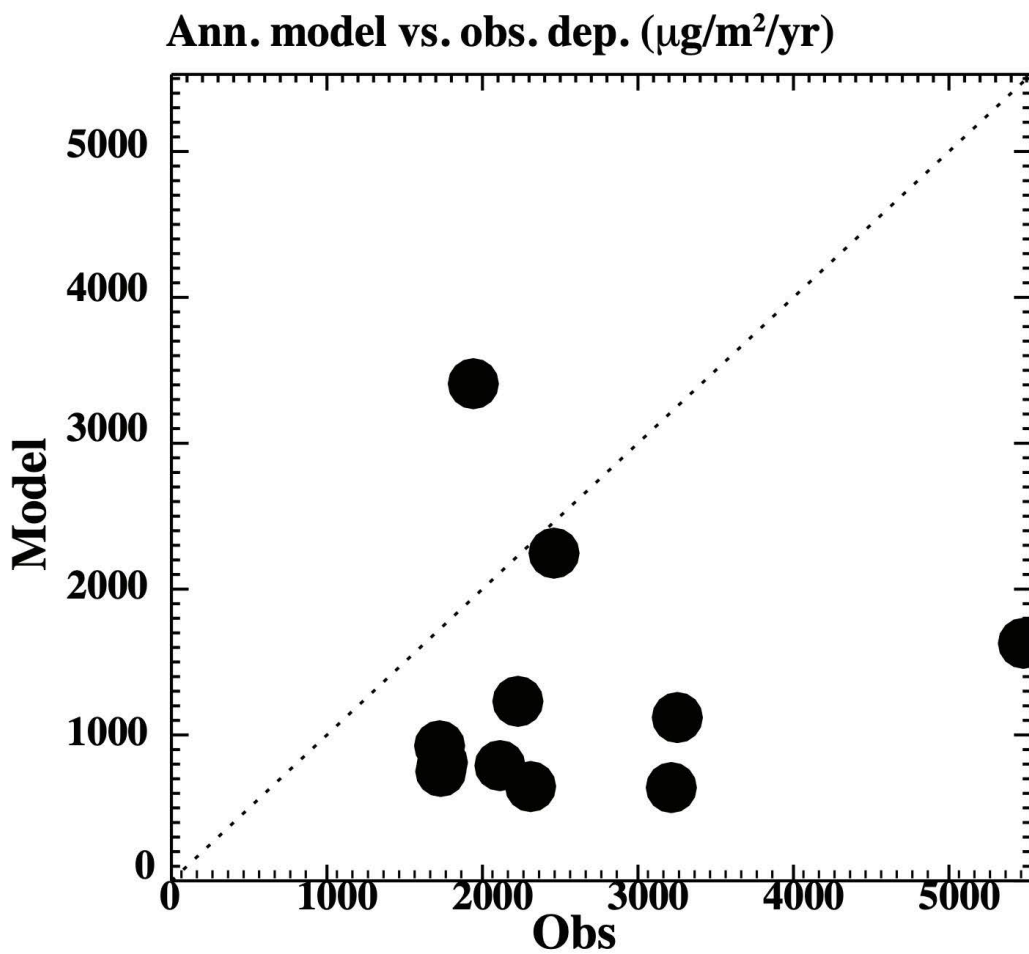

**Fig. S1. Scatter plot of annual average plastic deposition data at each station compared to the best fit of the model at the 11 different sites (shown in Figure 3a) ( $r=-0.33$ ,  $n=11$ ).**

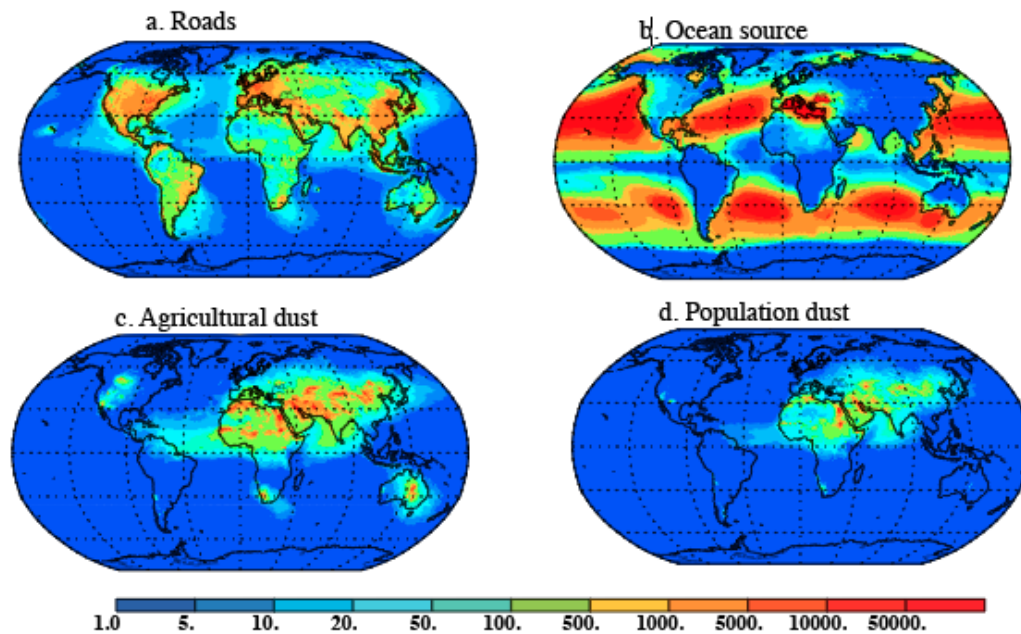

**Fig. S2.** The contribution of plastic deposition from each source to the model ( $\mu\text{g}/\text{m}^2/\text{year}$ ) globally for the (a) Road source, (b) Ocean source, (c) Agricultural Dust, and (d) Population Dust source. Since the population source is estimated to be zero for the base case, this is not plotted.

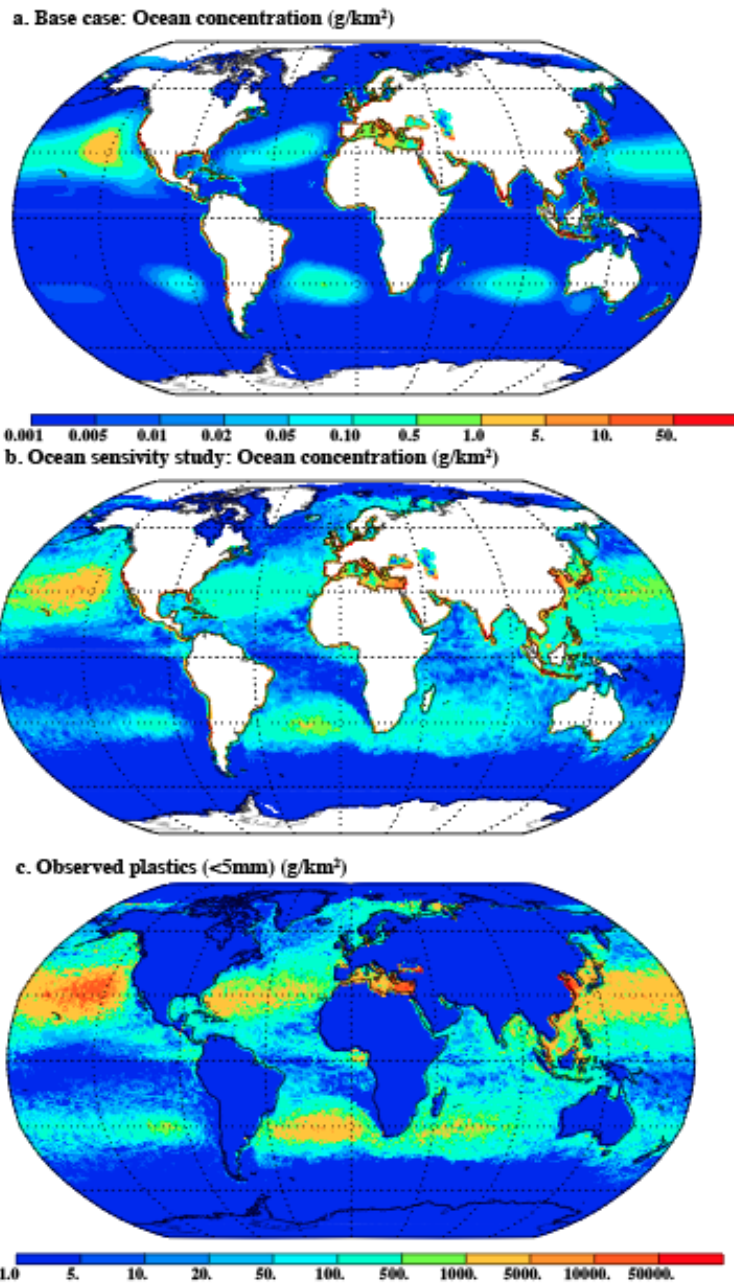

**Fig. S3.** Deduced ocean surface concentrations of microplastic using base case (a) Notice that the spatial distribution of this source is fixed based on gyre strength and van Sebille et al. 2016, as described in the Methods. (b) Estimated ocean surface concentration using the ocean sensitivity study (which uses the spatial distribution directly from van Sebille et al., 2016), and (c) the estimate of microplastic concentration, which are all plastics collected in trawling ( $\sim$ <5mm). Notice that the top two panels (a and b) use the same color bar, but c) uses a very different color bar (100x larger scale).

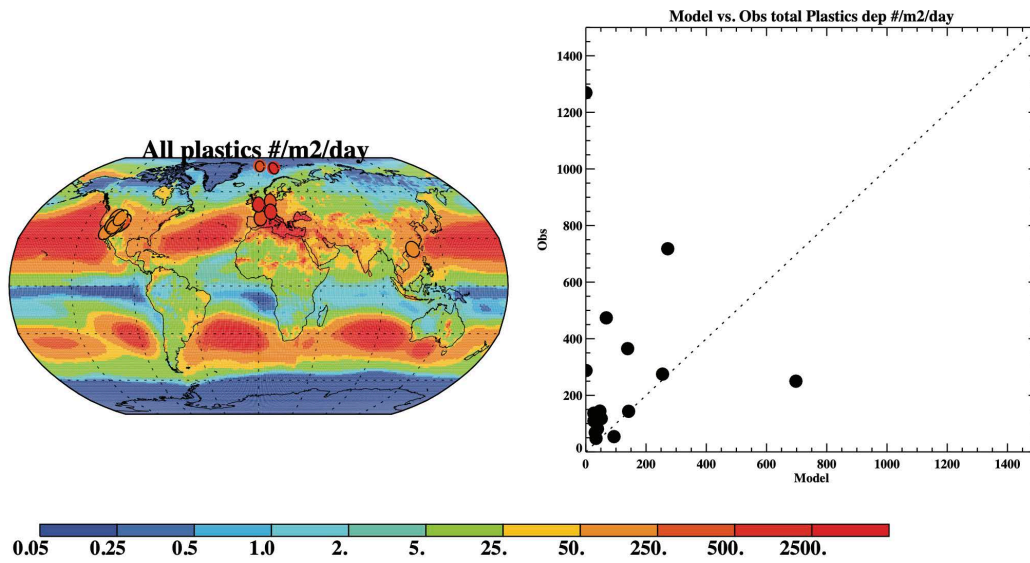

**Fig. S4.** Comparison of modeled microplastic deposition against available observations ( $\#/m^2/day$ ). Observational data comes from (1–6).

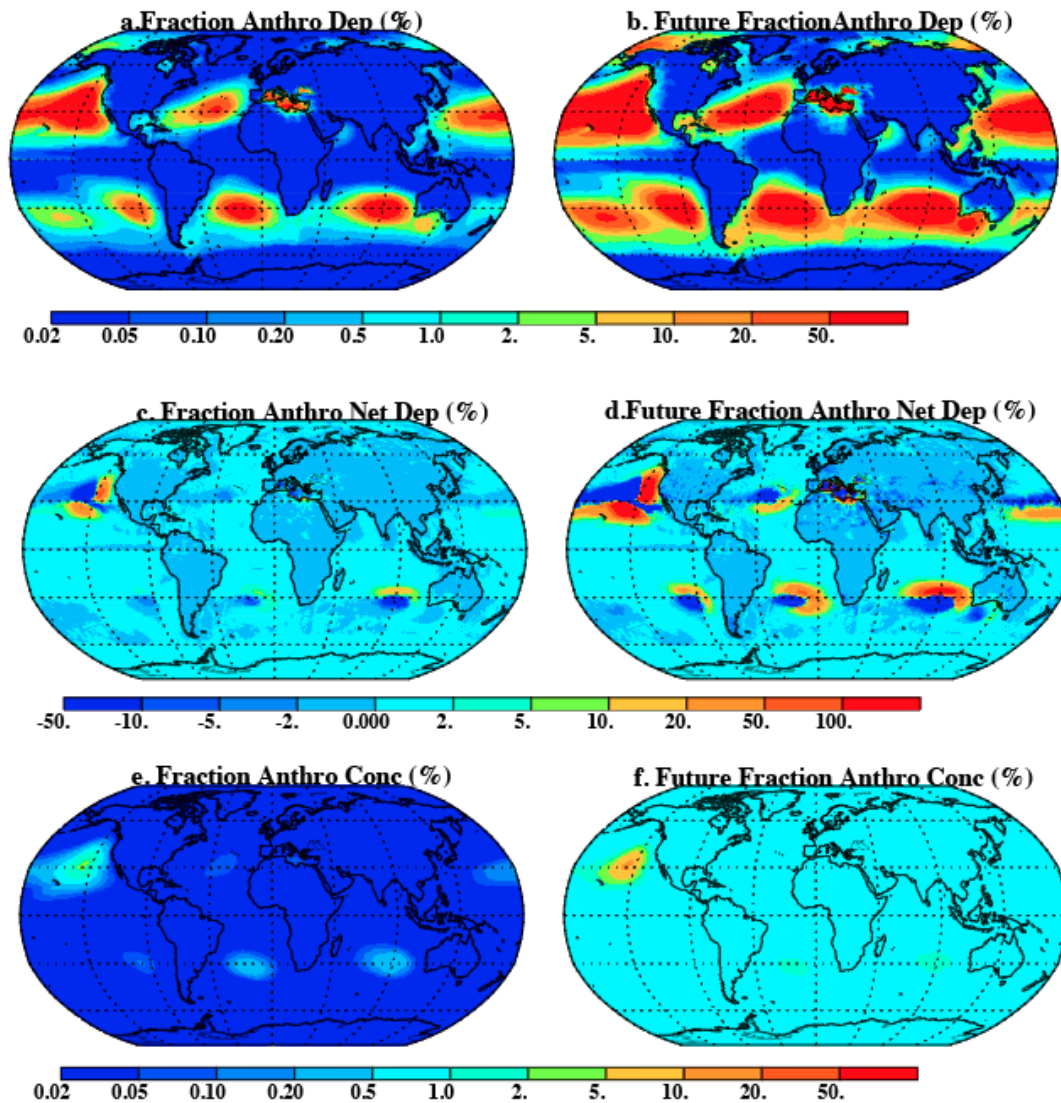

**Fig. S5.** Estimated current (a) and future (b) (assume 10x higher) fraction of gross deposition that is polymeric (%) as current deposition of plastics/total anthropogenic particle deposition. Total anthropogenic particles include black carbon, organic carbon, sulfate, and agricultural dust (to be conservative, we assume that all black carbon, organic carbon and sulfate are anthropogenic, although there were some deposition of these in preindustrial era (7)). Since much of the plastic deposition over the open ocean comes from upwind in the ocean, we also plot the % of the net deposition (deposition-source)/total anthropogenic deposition for (c) current and (d) future (assume 10x higher). Model estimated % current (e) and future (f) fraction of surface concentrations of anthropogenic aerosols that is polymeric (%).

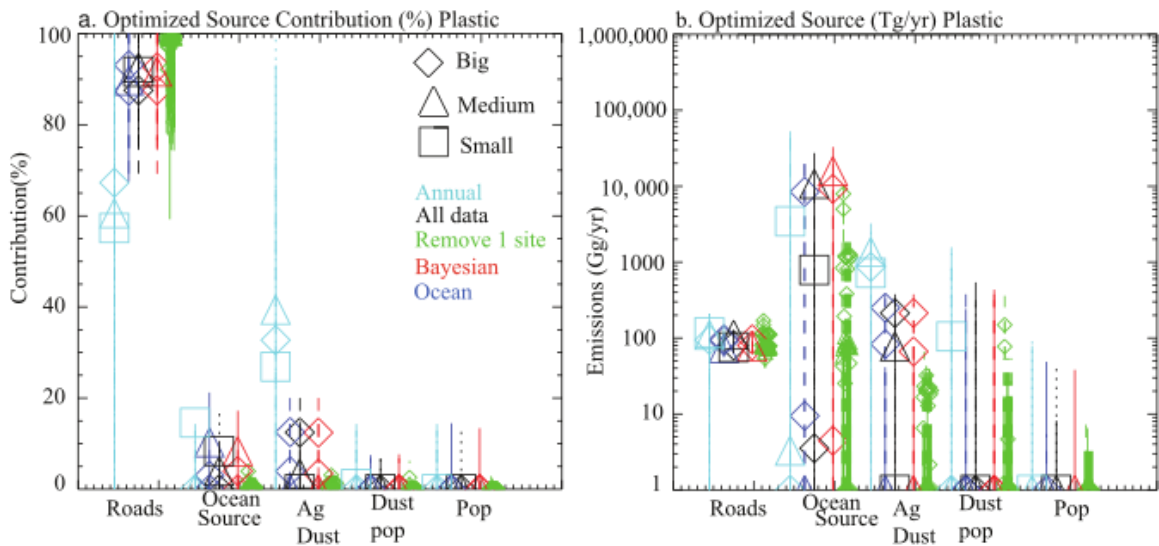

Figure S6: Comparison of the optimal estimation method with the sensitivity studies.

Similar to Figure 2b for (a), and figure 4a for (b): (a) Estimates of the contribution at the observing sites from different sources as inferred using the method described in the Methods section for the three sizes: big (diamond), medium (triangle), and small (square). For all sources and cases, the 95% confidence limits are shown as vertical lines. Multiple sensitivity studies were conducted (see Methods for details), with time averaging (cyan), and with each site withheld (green), showing the ranges of values that can be obtained for each relative source strength. New sensitivity study including a priori information about the sources (red), or with a different ocean source distribution (blue). (b) Globally average source of microplastics (a), as inferred using the method described in the Methods section for the three sizes: big (diamond), medium (triangle), and small (square). For all sources, the 95% confidence limits are shown as vertical lines. Multiple sensitivity studies were conducted (see Methods for details), with time averaging (cyan), and with each site withheld (green), showing the ranges of values that can be obtained for each source strength extrapolated globally. New sensitivity study including a priori information about the sources (red), or with a different ocean source distribution (blue).



**Table S1. Evaluation of optimal model simulations of plastics against available data, including wet and dry deposition (2). Station name, abbreviation from the NADP network, latitude, longitude, observational mean value, model mean value, correlation coefficient at each station, and number of observations.**

|                                           |                             | Mean<br>( $\mu\text{g}/\text{m}^2/\text{yr}$ ) | Mean<br>( $\mu\text{g}/\text{m}^2/\text{yr}$ ) |                            |                   |
|-------------------------------------------|-----------------------------|------------------------------------------------|------------------------------------------------|----------------------------|-------------------|
|                                           |                             | Obs.                                           | Model.                                         | Correlation<br>Coefficient | Number<br>of Obs. |
| All data                                  |                             | 1306                                           | 699                                            | 0.12                       | 316               |
| Observing<br>stations                     | Station Abr.<br>(Lat. Lon.) |                                                |                                                |                            |                   |
| Grand Canyon<br>National Park (NP),<br>AZ | AZ03<br>(36.1°N 247.8°E)    | 1001                                           | 578                                            | 0.09                       | 26                |
| Joshua Tree NP, CA                        | CA67<br>(34.1°N 243.6°E)    | 1105                                           | 1511                                           | -0.30                      | 19                |
| Indian Peaks, CO                          | CO02<br>(40.1°N 254.4°E)    | 1145                                           | 1928                                           | 0.49                       | 17                |
| East River, CO                            | CO10<br>(39.0°N 253.0°E)    | 1634                                           | 630                                            | 0.28                       | 42                |
| Rocky Mountain<br>NP, CO                  | CO98<br>(40.3°N 254.4°E)    | 2253                                           | 639                                            | 0.59                       | 44                |
| Craters of the<br>Mood NP, ID             | ID03<br>(43.5°N 246.5°E)    | 1393                                           | 542                                            | -0.21                      | 25                |
| Great Basin NP, NV                        | NV05<br>(39.0°N 245.8°E)    | 1045                                           | 688                                            | 0.45                       | 31                |
| Canyonlands NP,<br>UT                     | UT09<br>(38.46°N 250.2°E)   | 858                                            | 479                                            | -0.04                      | 27                |
| Unita National<br>Forest (NF), UT         | UT95<br>(40.8°N 250.5°E)    | 1340                                           | 655                                            | -0.22                      | 20                |
| Bryce Canyon NP,<br>UT                    | UT99<br>(37.6°N 247.8°E)    | 1095                                           | 457                                            | -0.14                      | 34                |
| Wind River , WY                           | WY06<br>(42.9°N 250.2°E)    | 774                                            | 428                                            | 0.38                       | 31                |
| Annual average                            |                             | 1240                                           | 776                                            | -0.03                      | 11                |

**Table S2. Model evaluation for dust and sea spray aerosols at the observing stations.**

|                   | Variable | Mean<br>( $\mu\text{g}/\text{m}^2/\text{day}$ )<br>Obs. | Mean<br>( $\mu\text{g}/\text{m}^2/\text{day}$ )<br>Model | Correlation<br>Coefficient | Number of<br>obs | % error |
|-------------------|----------|---------------------------------------------------------|----------------------------------------------------------|----------------------------|------------------|---------|
| Wet<br>deposition | Dust     | 9.50                                                    | 9.35                                                     | 0.15                       | 213              | 0.79    |
| Wet<br>deposition | Na       | 0.088                                                   | 0.053                                                    | 0.18                       | 213              | 24.75   |
| Dry<br>deposition | Dust     | 21.9                                                    | 5.51                                                     | 0.07                       | 103              | 59.83   |

**Table S3. Source strength of optimal estimation for the base case by bin in Tg/year of microplastics. Aerodynamic size of the microplastics are shown (inside parenthesis)**

|                     | Roads   | Ocean   | Ag dust | Pop dust |
|---------------------|---------|---------|---------|----------|
| Bin 1 (0.3 $\mu$ m) | 0.00070 | 0.00033 | 0.00001 | 0.000    |
| Bin 2 (2.5 $\mu$ m) | 0.0067  | 0.0035  | 0.0029  | 0.001    |
| Bin 3 (7 $\mu$ m)   | 0.020   | 0.029   | 0.011   | 0.003    |
| Bin 4 (15 $\mu$ m)  | 0.024   | 0.098   | 0.016   | 0.004    |
| Bin 5 (35 $\mu$ m)  | 0.023   | 1.09    | 0.019   | 0.005    |
| Bin 6 (70 $\mu$ m)  | 0.022   | 7.3     | 0.020   | 0.006    |
| Total               | 0.096   | 8.6     | 0.069   | 0.018    |
|                     |         |         |         |          |

**Table S4. Lifetime of different modeled sources in days. Aerodynamic size of the microplastics are shown (inside parenthesis)**

|                     | Roads | Ocean | Ag dust | Pop dust |
|---------------------|-------|-------|---------|----------|
| Bin 1 (0.3 $\mu$ m) | 2.96  | 1.72  | 6.83    | 6.07     |
| Bin 2 (2.5 $\mu$ m) | 2.80  | 1.68  | 6.60    | 5.99     |
| Bin 3 (7 $\mu$ m)   | 1.43  | 1.04  | 2.84    | 2.73     |
| Bin 4 (15 $\mu$ m)  | 0.45  | 0.45  | 0.79    | 0.75     |
| Bin 5 (35 $\mu$ m)  | 0.08  | 0.14  | 0.14    | 0.13     |
| Bin 6 (70 $\mu$ m)  | 0.04  | 0.08  | 0.07    | 0.06     |
| Total               | 0.65  | 0.10  | 0.96    | 0.94     |
|                     |       |       |         |          |
